# Supplementary material
Source: ML conference proceedings conference paper supplement (https://proceedings.neurips.cc/paper_files/paper/2011/hash/18997733ec258a9fcaf239cc55d53363-Abstract.html)
Supplement: Supplementary file [file 18997733ec258a9fcaf239cc55d53363-Supplemental.zip]

---

# Supplementary Material for Linearized Alternating Direction Method with Adaptive Penalty for Low-Rank Representation

---

**Zhouchen Lin**  
Visual Computing Group  
Microsoft Research Asia

**Risheng Liu**      **Zhixun Su**  
School of Mathematical Sciences  
Dalian University of Technology

## 1 Proof of Proposition 2

We present the proof of Proposition 2 in a more general setting. Namely,  $\lambda$  is updated as

$$\lambda_{k+1} = \lambda_k + \gamma\beta_k[\mathcal{A}(\mathbf{x}_{k+1}) + \mathcal{B}(\mathbf{y}_{k+1}) - \mathbf{c}]. \quad (21)$$

Even with this extra parameter  $\gamma$ , the proof of Theorem 3 is almost unchanged. We have a more general Proposition 2 as follows:

**Proposition 2** *If  $\{\beta_k\}$  is non-decreasing and upper bounded,  $\eta_A > \|\mathcal{A}\|^2$ ,  $\gamma \in (0, 2)$ ,  $\eta_B(2 - \gamma) > \|\mathcal{B}\|^2$ , and  $(\mathbf{x}^*, \mathbf{y}^*, \lambda^*)$  is any KKT point of problem (1), then:*

1.  $\{\eta_A\|\mathbf{x}_k - \mathbf{x}^*\|^2 - \|\mathcal{A}(\mathbf{x}_k - \mathbf{x}^*)\|^2 + \eta_B\|\mathbf{y}_k - \mathbf{y}^*\|^2 + \gamma^{-1}\beta_k^{-2}\|\lambda_k - \lambda^*\|^2\}$  is non-increasing.
2.  $\|\mathbf{x}_{k+1} - \mathbf{x}_k\| \rightarrow 0$ ,  $\|\mathbf{y}_{k+1} - \mathbf{y}_k\| \rightarrow 0$ ,  $\|\lambda_{k+1} - \lambda_k\| \rightarrow 0$ .

The proof of Proposition 2 is based on the following lemma.

### Lemma 1

$$\begin{aligned} & \eta_A\|\mathbf{x}_{k+1} - \mathbf{x}^*\|^2 - \|\mathcal{A}(\mathbf{x}_{k+1} - \mathbf{x}^*)\|^2 + \eta_B\|\mathbf{y}_{k+1} - \mathbf{y}^*\|^2 + \gamma^{-1}\beta_k^{-2}\|\lambda_{k+1} - \lambda^*\|^2 \\ &= \eta_A\|\mathbf{x}_k - \mathbf{x}^*\|^2 - \|\mathcal{A}(\mathbf{x}_k - \mathbf{x}^*)\|^2 + \eta_B\|\mathbf{y}_k - \mathbf{y}^*\|^2 + \gamma^{-1}\beta_k^{-2}\|\lambda_k - \lambda^*\|^2 \\ & - \left\{ (2 - \gamma)(\gamma\beta_k)^{-2}\|\lambda_{k+1} - \lambda_k\|^2 + \eta_B\|\mathbf{y}_{k+1} - \mathbf{y}_k\|^2 \right. \\ & \quad \left. - 2(\gamma\beta_k)^{-1}\langle \lambda_{k+1} - \lambda_k, \mathcal{B}(\mathbf{y}_{k+1} - \mathbf{y}_k) \rangle \right\} \\ & - (\eta_A\|\mathbf{x}_{k+1} - \mathbf{x}_k\|^2 - \|\mathcal{A}(\mathbf{x}_{k+1} - \mathbf{x}_k)\|^2) \\ & - 2\beta_k^{-1} \left\langle \mathbf{x}_{k+1} - \mathbf{x}^*, [-\beta_k\eta_A(\mathbf{x}_{k+1} - \mathbf{x}_k) - \mathcal{A}^*(\tilde{\lambda}_{k+1})] + \mathcal{A}^*(\lambda^*) \right\rangle \\ & - 2\beta_k^{-1} \left\langle \mathbf{y}_{k+1} - \mathbf{y}^*, [-\beta_k\eta_B(\mathbf{y}_{k+1} - \mathbf{y}_k) - \mathcal{B}^*(\hat{\lambda}_{k+1})] + \mathcal{B}^*(\lambda^*) \right\rangle. \end{aligned} \quad (22)$$

This identity can be routinely checked, by using the definitions of  $\tilde{\lambda}_{k+1}$  and  $\hat{\lambda}_{k+1}$  and the following facts:

1.  $2\langle \mathbf{a}_{k+1} - \mathbf{a}^*, \mathbf{a}_{k+1} - \mathbf{a}_k \rangle = \|\mathbf{a}_{k+1} - \mathbf{a}^*\|^2 - \|\mathbf{a}_k - \mathbf{a}^*\|^2 + \|\mathbf{a}_{k+1} - \mathbf{a}_k\|^2$ .
2.  $\mathcal{A}(\mathbf{x}^*) + \mathcal{B}(\mathbf{y}^*) = \mathbf{c}$ .
3.  $\langle \lambda, \mathcal{A}(\mathbf{x}) \rangle = \langle \mathcal{A}^*(\lambda), \mathbf{x} \rangle$ ,  $\langle \lambda, \mathcal{B}(\mathbf{y}) \rangle = \langle \mathcal{B}^*(\lambda), \mathbf{y} \rangle$ .

As it is lengthy and tedious, we omit the complete details.

**Proof** (of Proposition 2) By Lemma 1 and the given conditions, it is easy to check that

$$\eta_A\|\mathbf{w}\|^2 - \|\mathcal{A}(\mathbf{w})\|^2 \geq 0, \quad \text{for } \mathbf{w} = \mathbf{x}_{k+1} - \mathbf{x}^*, \mathbf{x}_k - \mathbf{x}^*, \mathbf{x}_{k+1} - \mathbf{x}_k,$$

$$(2 - \gamma)(\gamma\beta_k)^{-2}\|\lambda_{k+1} - \lambda_k\|^2 + \eta_B\|\mathbf{y}_{k+1} - \mathbf{y}_k\|^2 - 2(\gamma\beta_k)^{-1}\langle\lambda_{k+1} - \lambda_k, \mathcal{B}(\mathbf{y}_{k+1} - \mathbf{y}_k)\rangle \geq 0.$$

The last two terms in (22) are also nonnegative due to Proposition 1 and the monotonicity of sub-gradient mapping. So Proposition 2 (1) is obvious due to the non-decrement of  $\{\beta_k\}$ .

Then as  $\{\eta_A\|\mathbf{x}_k - \mathbf{x}^*\|^2 - \|\mathcal{A}(\mathbf{x}_k - \mathbf{x}^*)\|^2 + \eta_B\|\mathbf{x}_k - \mathbf{x}^*\|^2 + \gamma^{-1}\beta_k^{-2}\|\lambda_k - \lambda^*\|^2\}$  is non-increasing and non-negative, it has a limit. Then we can see that

$$\eta_A\|\mathbf{x}_{k+1} - \mathbf{x}_k\|^2 - \|\mathcal{A}(\mathbf{x}_{k+1} - \mathbf{x}_k)\|^2 \rightarrow 0,$$

$$(2 - \gamma)(\gamma\beta_k)^{-2}\|\lambda_{k+1} - \lambda_k\|^2 + \eta_B\|\mathbf{y}_{k+1} - \mathbf{y}_k\|^2 - 2(\gamma\beta_k)^{-1}\langle\lambda_{k+1} - \lambda_k, \mathcal{B}(\mathbf{y}_{k+1} - \mathbf{y}_k)\rangle \rightarrow 0,$$

due to their non-negativity. So  $\|\mathbf{x}_{k+1} - \mathbf{x}_k\| \rightarrow 0$  follows from the first limit.

Note that

$$\begin{aligned} & (2 - \gamma)(\gamma\beta_k)^{-2}\|\lambda_{k+1} - \lambda_k\|^2 + \eta_B\|\mathbf{y}_{k+1} - \mathbf{y}_k\|^2 - 2(\gamma\beta_k)^{-1}\langle\lambda_{k+1} - \lambda_k, \mathcal{B}(\mathbf{y}_{k+1} - \mathbf{y}_k)\rangle \\ & \geq (2 - \gamma)(\gamma\beta_k)^{-2}\|\lambda_{k+1} - \lambda_k\|^2 + \eta_B\|\mathbf{y}_{k+1} - \mathbf{y}_k\|^2 - 2(\gamma\beta_k)^{-1}\|\lambda_{k+1} - \lambda_k\|\|\mathcal{B}(\mathbf{y}_{k+1} - \mathbf{y}_k)\| \\ & = ((2 - \gamma)^{1/2}(\gamma\beta_k)^{-1}\|\lambda_{k+1} - \lambda_k\| - (2 - \gamma)^{-1/2}\|\mathcal{B}(\mathbf{y}_{k+1} - \mathbf{y}_k)\|)^2 \\ & \quad + \eta_B\|\mathbf{y}_{k+1} - \mathbf{y}_k\|^2 - (2 - \gamma)^{-1}\|\mathcal{B}(\mathbf{y}_{k+1} - \mathbf{y}_k)\|^2 \\ & \geq \eta_B\|\mathbf{y}_{k+1} - \mathbf{y}_k\|^2 - (2 - \gamma)^{-1}\|\mathcal{B}(\mathbf{y}_{k+1} - \mathbf{y}_k)\|^2. \end{aligned}$$

So we have that  $\|\mathbf{y}_{k+1} - \mathbf{y}_k\| \rightarrow 0$ . On the other hand,

$$\begin{aligned} & (2 - \gamma)(\gamma\beta_k)^{-2}\|\lambda_{k+1} - \lambda_k\|^2 + \eta_B\|\mathbf{y}_{k+1} - \mathbf{y}_k\|^2 - 2(\gamma\beta_k)^{-1}\langle\lambda_{k+1} - \lambda_k, \mathcal{B}(\mathbf{y}_{k+1} - \mathbf{y}_k)\rangle \\ & = ((2 - \gamma)^{1/2}(\gamma\beta_k)^{-1}\|\lambda_{k+1} - \lambda_k\| - \sqrt{\eta_B}\|\mathbf{y}_{k+1} - \mathbf{y}_k\|)^2 \\ & \quad + 2(\gamma\beta_k)^{-1}\left(\sqrt{\eta_B(2 - \gamma)}\|\lambda_{k+1} - \lambda_k\|\|\mathbf{y}_{k+1} - \mathbf{y}_k\| - \langle\lambda_{k+1} - \lambda_k, \mathcal{B}(\mathbf{y}_{k+1} - \mathbf{y}_k)\rangle\right) \\ & \geq ((2 - \gamma)^{1/2}(\gamma\beta_k)^{-1}\|\lambda_{k+1} - \lambda_k\| - \sqrt{\eta_B}\|\mathbf{y}_{k+1} - \mathbf{y}_k\|)^2. \end{aligned}$$

So  $(2 - \gamma)^{1/2}(\gamma\beta_k)^{-1}\|\lambda_{k+1} - \lambda_k\| - \sqrt{\eta_B}\|\mathbf{y}_{k+1} - \mathbf{y}_k\| \rightarrow 0$ . This together with  $\|\mathbf{y}_{k+1} - \mathbf{y}_k\| \rightarrow 0$  results in  $\|\lambda_{k+1} - \lambda_k\| \rightarrow 0$ .

## 2 Solving LRR via APG

The LRR problem can also be relaxed to the following unconstrained optimization problem:

$$\min \beta\|\mathbf{Z}\|_* + \beta\mu\|\mathbf{E}\|_{2,1} + \frac{1}{2}\|\mathbf{X} - \mathbf{XZ} - \mathbf{E}\|^2, \quad (23)$$

where  $\beta > 0$  is a relaxation parameter. Then we can apply APG to solve this problem. The two subproblems to update  $\mathbf{E}$  and  $\mathbf{Z}$  are:

$$\mathbf{E}_{k+1} = \arg \min_{\mathbf{E}} \mu\beta\|\mathbf{E}\|_{2,1} + \frac{\tau}{2}\|\mathbf{E} - (\bar{\mathbf{E}}_k - \frac{1}{2\tau}\nabla_E\|\mathbf{X} - \mathbf{XZ} - \mathbf{E}\|^2|_{\bar{\mathbf{E}}_k, \bar{\mathbf{Z}}_k})\|^2, \quad (24a)$$

$$\mathbf{Z}_{k+1} = \arg \min_{\mathbf{Z}} \beta\|\mathbf{Z}\|_* + \frac{\tau}{2}\|\mathbf{Z} - (\bar{\mathbf{Z}}_k - \frac{1}{2\tau}\nabla_Z\|\mathbf{X} - \mathbf{XZ} - \mathbf{E}\|^2|_{\bar{\mathbf{E}}_k, \bar{\mathbf{Z}}_k})\|^2, \quad (24b)$$

where  $\tau \geq \sigma_{\max}^2(\mathbf{X})$  is a Lipschitz constant.

The APG approach, with the continuation technique, for the LRR problem is described in Algorithm 3.

## 3 Convergence Behaviors of Tested Algorithms

In Figure 1, we plot the relative changes of  $\mathbf{E}_k$  and  $\mathbf{Z}_k$  and the feasibility errors at all iterations for four test algorithms, respectively. We can see the errors of LADMAP in the two KKT conditions drop much quicker than other methods.

---

**Algorithm 3** APG for LRR
 

---

**Input:** Observation matrix  $\mathbf{X}$  and parameter  $\mu > 0$ .

**Initialize:** Set  $\mathbf{E}_0 = \mathbf{E}_{-1} = \mathbf{0}$  and  $\mathbf{Z}_0 = \mathbf{Z}_{-1} = \mathbf{0}$ .

Set  $\varepsilon_1 > 0, \varepsilon_2 > 0, \beta_0 \gg \beta_{\min} > 0, t_0 = t_{-1} = 1, \theta < 1, \tau \geq \sigma_{\max}^2(\mathbf{X})$ , and  $k \leftarrow 0$ .

**while** not converged **do**

**Step 1:** Update  $\bar{\mathbf{E}}_k = \mathbf{E}_k + \frac{t_{k-1}-1}{t_k}(\mathbf{E}_k - \mathbf{E}_{k-1})$ ,  $\bar{\mathbf{Z}}_k = \mathbf{Z}_k + \frac{t_{k-1}-1}{t_k}(\mathbf{Z}_k - \mathbf{Z}_{k-1})$ .

**Step 2:** Update  $\mathbf{G}_k^E = \bar{\mathbf{E}}_k + \frac{1}{\tau}(\mathbf{X} - \mathbf{X}\bar{\mathbf{Z}}_k - \bar{\mathbf{E}}_k)$ .

**Step 3:** Update  $\mathbf{E}_{k+1} = \mathcal{S}_{\frac{\mu\beta_k}{\tau}}(\mathbf{G}_k^E)$ , where  $\mathcal{S}$  is the shrinkage operator.

**Step 4:** Update  $\mathbf{G}_k^Z = \bar{\mathbf{Z}}_k + \frac{1}{\tau}\mathbf{X}^T(\mathbf{X} - \mathbf{X}\bar{\mathbf{Z}}_k - \bar{\mathbf{E}}_k)$ .

**Step 5:** Update  $\mathbf{Z}_{k+1} = \mathbf{U}\mathcal{S}_{\frac{\beta_k}{\tau}}(\Sigma)\mathbf{V}^T$ , where  $\mathbf{U}\Sigma\mathbf{V}^T$  is the SVD of  $\mathbf{G}_k^Z$ .

**Step 6:** Update  $t_{k+1} = \frac{1+\sqrt{4t_k^2+1}}{2}$ ,  $\beta_{k+1} = \max(\beta_{\min}, \theta\beta_k)$ .

**Step 7:** Check the convergence conditions:

$$\frac{\|\mathbf{X}\mathbf{Z}_{k+1} + \mathbf{E}_{k+1} - \mathbf{X}\|}{\|\mathbf{X}\|} \leq \varepsilon_1 \text{ and } \max\left(\frac{\|\mathbf{Z}_{k+1} - \mathbf{Z}_k\|}{\|\mathbf{X}\|}, \frac{\|\mathbf{E}_{k+1} - \mathbf{E}_k\|}{\|\mathbf{X}\|}\right) \leq \varepsilon_2.$$

If they are satisfied, break.

**Step 8:**  $k \leftarrow k + 1$ .

**end while**

---

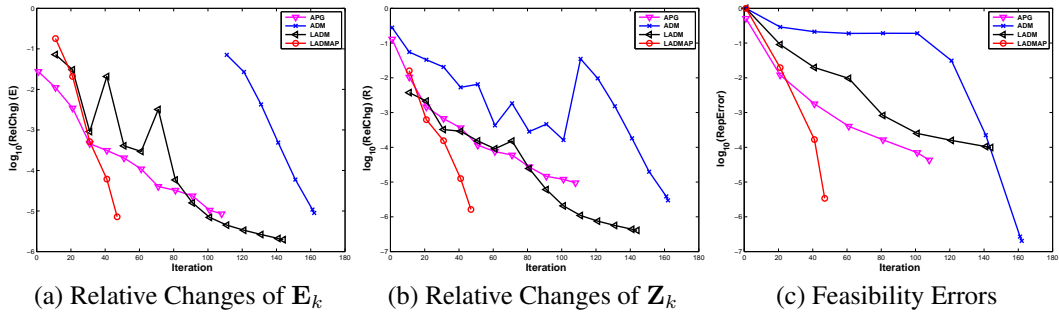

Figure 1: Convergence behaviors of APG, ADM, LADM, LADMAP on the toy data  $\mathbf{X}$  generated with parameters (5, 20, 100, 5). The changes and errors are in  $\log_{10}$  scale. In (a) and (b), as the relative changes of  $\mathbf{E}_k$  and  $\mathbf{Z}_k$  in the first several iterations are zeros, which corresponds to  $-\infty$  in the plots, we only report the nonzero relative changes of  $\mathbf{E}_k$  and  $\mathbf{Z}_k$ .
